# Supplementary material for: Hotspot mutations in HER2 interfaces destabilize structure, causing breast cancer treatment failure
Source: Research Square preprint supplement (doi:10.21203/rs.3.rs-5931887/v1), 2025-03-20
Supplement: Supplementary file 1 [file e1f2ff2b056823b3a426cc28.docx]

Supplementary data

Title: Hotspot mutations in HER2 interfaces destabilize structure, causing breast cancer treatment failure

Pranay Dey[[1]](#footnote-1),[[2]](#footnote-2), Aniketh Bishnu2,[[3]](#footnote-3), Janvi Patel1,2, Shivali Mishra1,2, Nikhil Gadewal[[4]](#footnote-4), Pritha Ray2,3, Sudeep Gupta[[5]](#footnote-5),[[6]](#footnote-6), Abhijit De1,2,[[7]](#footnote-7),*

**Extended material and methods**

**Molecular dynamic simulations**

The systems, consisting of a cubic box with periodic boundary conditions, involved the solvation of structures using the TIP3P water model. Counterions were added to neutralize the total charge, employing the OPLS-AA force field. Initial energy minimization and subsequent equilibration were performed by applying positional restraints through NVT for 500 ps, followed by NPT for 2 ns, 500 ns production run, and trajectories saved every 10 ps.

**Docking**

Chain assignments for both proteins were edited using the PDB editor. Prior to docking, all co-factors atoms were removed from both structures. The most favorable cluster, exhibiting the lowest HADDOCK score, was selected. Subsequently, these docked structures were subjected to MDS for 500 ns to assess their homodimer stability.

**Protein–protein interaction analysis**

PDBePISA’s algorithm measured several properties, including the buried surface area at interface, interacting residues at the interface, ΔGint (gain of solvation free energy upon formation of dimer), number of hydrogen bonds at interface, and entropy of assembly (TDS). The dimer interfaces of H2-WT and its DDMs homo-dimers were analyzed at every 100 ns of MDS.

**Preparation of expression plasmid**

Briefly, H2-WT sequence was PCR amplified using the corresponding site-directed mutagenesis (SDM) primers, followed by digestion with Dpn1 for 5 h at 37° C. Subsequently, 10 µL of the reaction mixture was transformed into the DH5α strain. After 24 h, colonies were screened for SDM by sequencing.

**Establishment of stable cell line**

To establish cell lines constitutively overexpressing the transgene, 48 h after transfection, cells were replenished with fresh medium added with puromycin antibiotic (700 ng/mL) and regularly changed every 3–4 days. Once the 2–3 mm colonies formed in approximately 18–21 days, well separated clonal cells were transferred to 96-well plates. Positive clones with the highest expression were confirmed for HER2 expression using immunoblotting and utilized for subsequent experiments. Cells were constantly maintained under puromycin selection until stored in liquid N2.

**3’-UTR knockdown for endogenous HER2**

By co-transfecting HEK293FT cells with the pLL3.7-GFP vector with 3’UTR HER2 shRNA (**Supplementary Table 3**), along with packaging plasmid and envelop (pVSVG) plasmids as per standard. Lentiviral transduction of AU-565 cells followed an established protocol1,2. To establish a endogenous HER2 knockdown population, after viral transduction, GFP positive cell were FACS sorted for three rounds over successive passages, resulting in an approximately 94% GFP positive (HER2-knockdown) cells.

**Live cell luciferase reporter assay**

Live cells expressing firefly luciferase reporter were seeded in triplicate at a density of 5000 cells/well in a black 96-well plate with clear bottom. Trastuzumab and neratinib were added to respective wells at varying doses indicated. Every 24 h, 50 µL of D-luciferin substrate (diluted 1:1000 in medium) was added to each well, and luminescence photons were quantified using an IVIS spectrum photon imager with an open filter setting.

**Immunoblotting**

ZR-75-1 and MCF-7 cells were seeded in 35 mm dishes, followed by transfection with H2-WT or the DDM plasmids (S305C, G309A, S310Y, S310F, and P523S). In case of HER2 high AU-565 and BT-474 cells, 3’-UTR mediated endogenous HER2 knockdown was performed before expressing H2-WT or DDM-containing plasmids. After 24 h, complete media was removed, and the cells were washed thrice with 1× PBS. Subsequently, the cells were incubated in serum-free media for 24 h to inhibit the growth factor signaling. The cells were then incubated with 15 ng/mL heregulin-1β for 15 min to fully activate HER2:HER3-mediated signaling. After removing the ligand-containing media, cells were lysed for immunoblotting using RIPA buffer. Equal amounts of protein from unstimulated and stimulated cells were separated using 7.5% SDS-PAGE for membranous proteins and 10% SDS-PAGE for cytoplasmic proteins. The separated proteins were subsequently transferred onto a nitrocellulose membrane (BioTrace NT, Pall Corporation, NY, USA) using a wet transfer blotting apparatus. After blocking with 5% non-fat milk for membranous proteins and 5% bovine serum albumin (BSA) for cytoplasmic proteins, the nitrocellulose membranes were probed with respective mAbs against pan-HER2, p-HER2, pan-HER3, p-HER3, pan-AKT, p-AKT, pan-ERK, p-ERK, and α-tubulin (1:1000 dilution for all targets, 1:500 dilution for p-HER2 and p-HER3) overnight at 4℃. Subsequently, the blots were probed with HRP-conjugated secondary antibodies and developed using a Chemidoc system. Total (pan) forms of proteins were used for quantitative assessments of their respective phospho forms, and α-tubulin blots were used for the remaining semi-quantitative analyses. Where necessary, stripping was performed following the Abcam stripping protocol, and the membrane was re-probed with a different mAb.

**Immunofluorescence**

For immunofluorescence (IF) investigations, ZR-75-1 cells expressing H2-WT or DDMs were exposed to their respective IC50 doses of tucatinib for 24 h. Subsequently, these cells were fixed with 4% paraformaldehyde. Blocking was done using 2% BSA, followed by an overnight incubation with p-HER2 (1:100), pan-HER2 (1:200), p-HER3 (1:200), and pan-HER3 (1:200) antibodies at 4°C. Afterwards, the cells were washed with PBS and incubated with anti-mouse or anti-rabbit Alexa 488, or Dylight 633 secondary antibodies (1:500) for 1 h at room temperature. Fluorescence micrographs were captured using Carl Zeiss LSM 780 confocal microscope (Carl Zeiss AG, Germany) with a 63× objective. DAPI was used for nuclear counterstaining.

**Co-immunoprecipitation**

Cell lysis was performed using co-IP RIPA buffer (1.5 M Tris-Cl, pH 8; 5 M NaCl; 0.5 M EDTA, pH 8; 10% NP-40; 10% sodium-deoxycholate; and 10% SDS). A total of 250 µg of lysate was incubated with 10 µL (0.1 µg/ µL) of HER3 mAb and 600 µL of co-IP RIPA buffer. This mixture was incubated at 4°C overnight, followed by addition of 40 µL of 1% BSA blocked beads (Protein G Sepharose® 4 Fast Flow, # GE17-0618-01) and incubation for 6 h at 4°C. After 6 hours, the beads were washed thrice with wash buffer at 4°C for 5 minutes each. The elution was performed by adding 5× reducing protein dye onto the beads, boiling at 95°C, and loading onto a 7.5% SDS gel. The gel was then transferred onto a nitrocellulose membrane using a wet transfer apparatus, blocked with 5% skim milk, and probed for HER2. Blots were stripped using the Abcam stripping protocol when necessary and re-probed for HER3 to confirm the interaction of HER2:HER3.

A similar procedure was employed for co-IP in ZR-75-1 and AU-565 cells expressing H2-WT and its mutants. These cell lines were seeded in 60 mm dishes, subjected to serum starvation for 24 h, stimulated with ligand, and then processed for immunoprecipitation. For reverse-immunoprecipitation in ZR-75-1 cells, a similar procedure was followed, but HER3 mAb was used for immunoprecipitation. For the validation of HER2 and HER3 interaction, endogenous HER3 TRIM-ing was performed in ZR-75-1 cells expressing HER2 and its DDMs. Cells were transfected with TRIM21 plasmid, and 36 h after transfection, 1 µg/ µL of HER3 mAb was transfected into the cells while incubated in incomplete media. Twelve hours post-transfection of the mAb, cells were stimulated with 10 ng/mL of heregulin-1βfor 10 mins. Cell lysate was prepared using co-IP RIPA buffer and subjected to immunoprecipitation using HER2 mAb to validate the physical interaction of HER2 and HER3.

***In vitro* survival assay**

For clonogenic assessment, 1000 ZR-75-1 cells and 1500 AU-565 cells overexpressing HER2 DDMs were seeded in a 6-well plate. After 16 h, ZR-75-1 cells were exposed to trastuzumab (100 µg/mL, 200 µg/mL) and neratinib (40 nM, 80 nM) treatments, while AU-565 cells were treated with trastuzumab (10 ng/mL, 50 ng/mL) and neratinib (1 nM, 5 nM) for 48 h. After removing the drugs, the remaining cells were allowed to form colonies for at least 14 days, with media changes every 2–3 days.

**Soft agar assay**

The 3-D anchorage-independent growth of ZR-75-1 cells expressing H2-WT and its DDMs was assessed by soft agar assay. The procedure involved making 1% base agarose bed and 0.5% top-agarose bed, following established protocols in the published literature1. In a 12-well plate, 5000 cells/well were seeded with top-agarose. After solidification, 500 µL of media containing trastuzumab (100 µg/mL or 200 µg/mL) was added, and the media was replenished after 48 h with fresh inhibitor. The assay was conducted for 14 days, and 0.05% crystal violet was used to stain the cells embedded in agarose.

**Proliferation assay**

1500 ZR-75-1 cells and 2500 AU-565 cells overexpressing HER2 DDMs were seeded in 24 well plate and kept in Incucyte (Sartorius) for 5 days. The media was changed every 48h, the cell growth was measured every 24h for all the DDMs. To calculate the increase in proliferation for ZR-75-1 cells, the ratio of cell number on day 1-5 vs cell number on day 0 was plotted. For AU-565 cells, the ration of GFP cell fluorescence/ field on day1-5 vs day 0 was plotted.

**Annexin V/PI apoptosis assay**

To assess whether trastuzumab induces apoptosis in H2-WT and its DDMs at higher doses (200 µg/mL and 400 µg/mL), the cells were treated for 24 h. For detection of apoptosis, ZR-75-1 cells expressing H2-WT or DDMs (1 × 105) were stained with propidium iodide (PI) and FITC-conjugated Annexin V (BD PharmingenTM apoptosis detection kit, Franklin Lakes, NJ, USA), following the manufacturer’s protocol. Briefly, ZR-75-1 cells were harvested in ice-cold PBS and then resuspended in 100 µL of Annexin V binding buffer, followed by the addition of 3 µL of Annexin V-FITC and 2 µL of PI. After 15 min incubation in dark at room temperature, 200 µL of Annexin V binding buffer was added to each FACS tube, and the samples were analyzed (25–50,000 events) in Attune NxT Flow cytometer (Thermo Fisher Scientific, Waltham, MA, USA). Flow cytometry data were analyzed using FlowJo version 10 software.

**Wound healing assessment**

A total of 12,000 ZR-75-1 cells and 15,000 AU-565 cells expressing H2-WT and its DDMs were seeded in 96-well wound healing plate (Sartorius AG, Göttingen, Germany) and 24-well plate, respectively (# CLS3527, Corning Inc., NY, USA). Wounds were created using wound maker (# 9600-0012, Sartorius) and 200 L yellow tip, respectively. Subsequently, the cells were washed with 1× PBS and then incubated in mitomycin C (25 µg/mL) for 4 h. The wound healing assessment was performed using Incucyte system (Sartorius) over a period of 48 hours.

**Human MAPK and AKT phosphorylation array analysis**

Lysates were prepared either from cells grown in complete medium or from harvested tumor tissues for mouse experiments. The analysis was performed according to the formula: X(Ny) = X(y) × P1/P(y). Here, P1 represents mean signal of positive control spots on reference array; P(y) is mean signal density of positive control spots on array ‘y’, and X(y) is normalized signal intensity for spot ‘X’ on array ‘y’. The fold change (X) was calculated by dividing the intensity of protein of interest by the background intensity of that array.

**Supplementary figures**

**
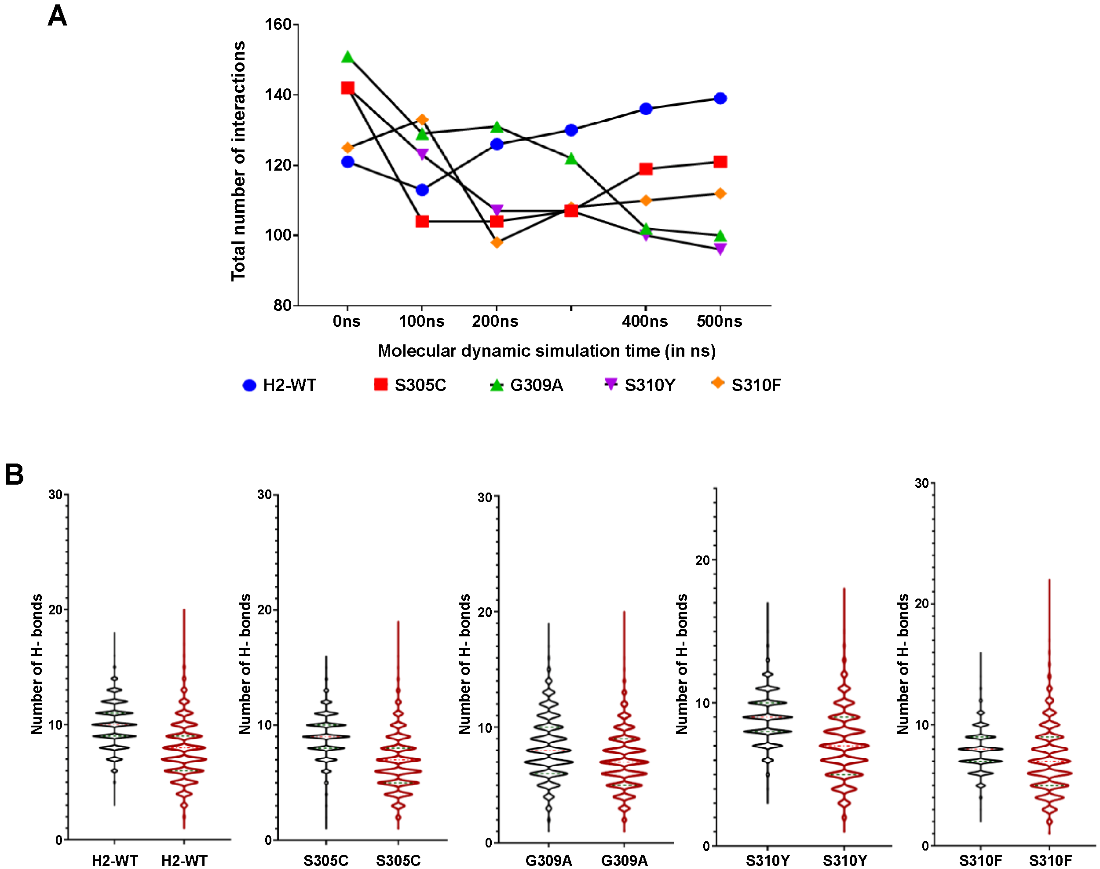
**

**Fig. S1:** (**A**) Graph showing increase in total number of interactions stabilizing the H2-WT homo-dimers, but a decreasing trend for G309A, S310Y, and S310F mutants. (**B)** Box and violin plots showing decrease in number of hydrogen bonds involved in HER2 dimerization domain mutations during the course of simulation.

**
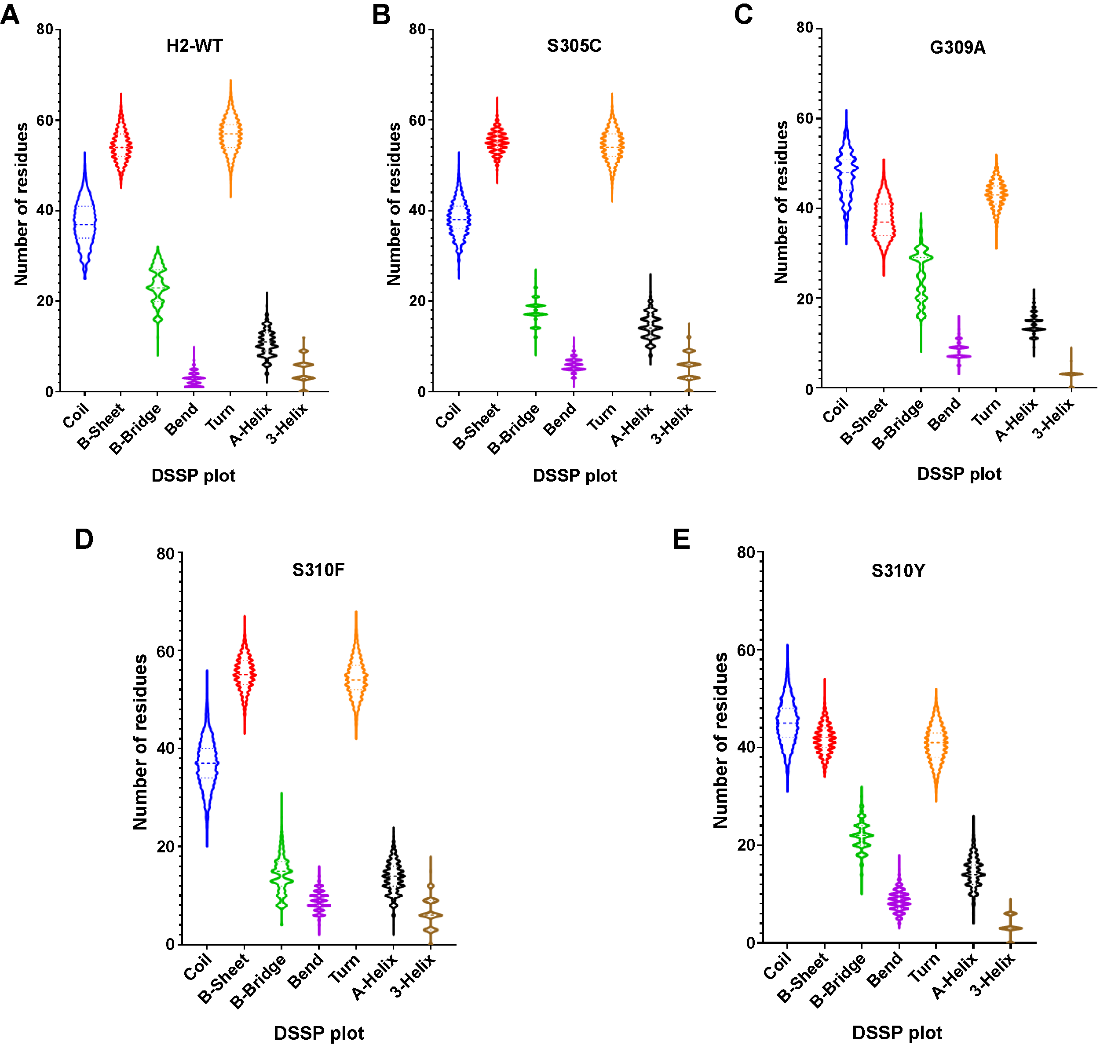
**

**Fig. S2 (A-E)** Graphs showing the residues involved in different secondary structures analyzed by Define Secondary Structure of Proteins (DSSP) during the last 100 ns of MD simulation time for HER2 and its dimerization domain mutations.

**
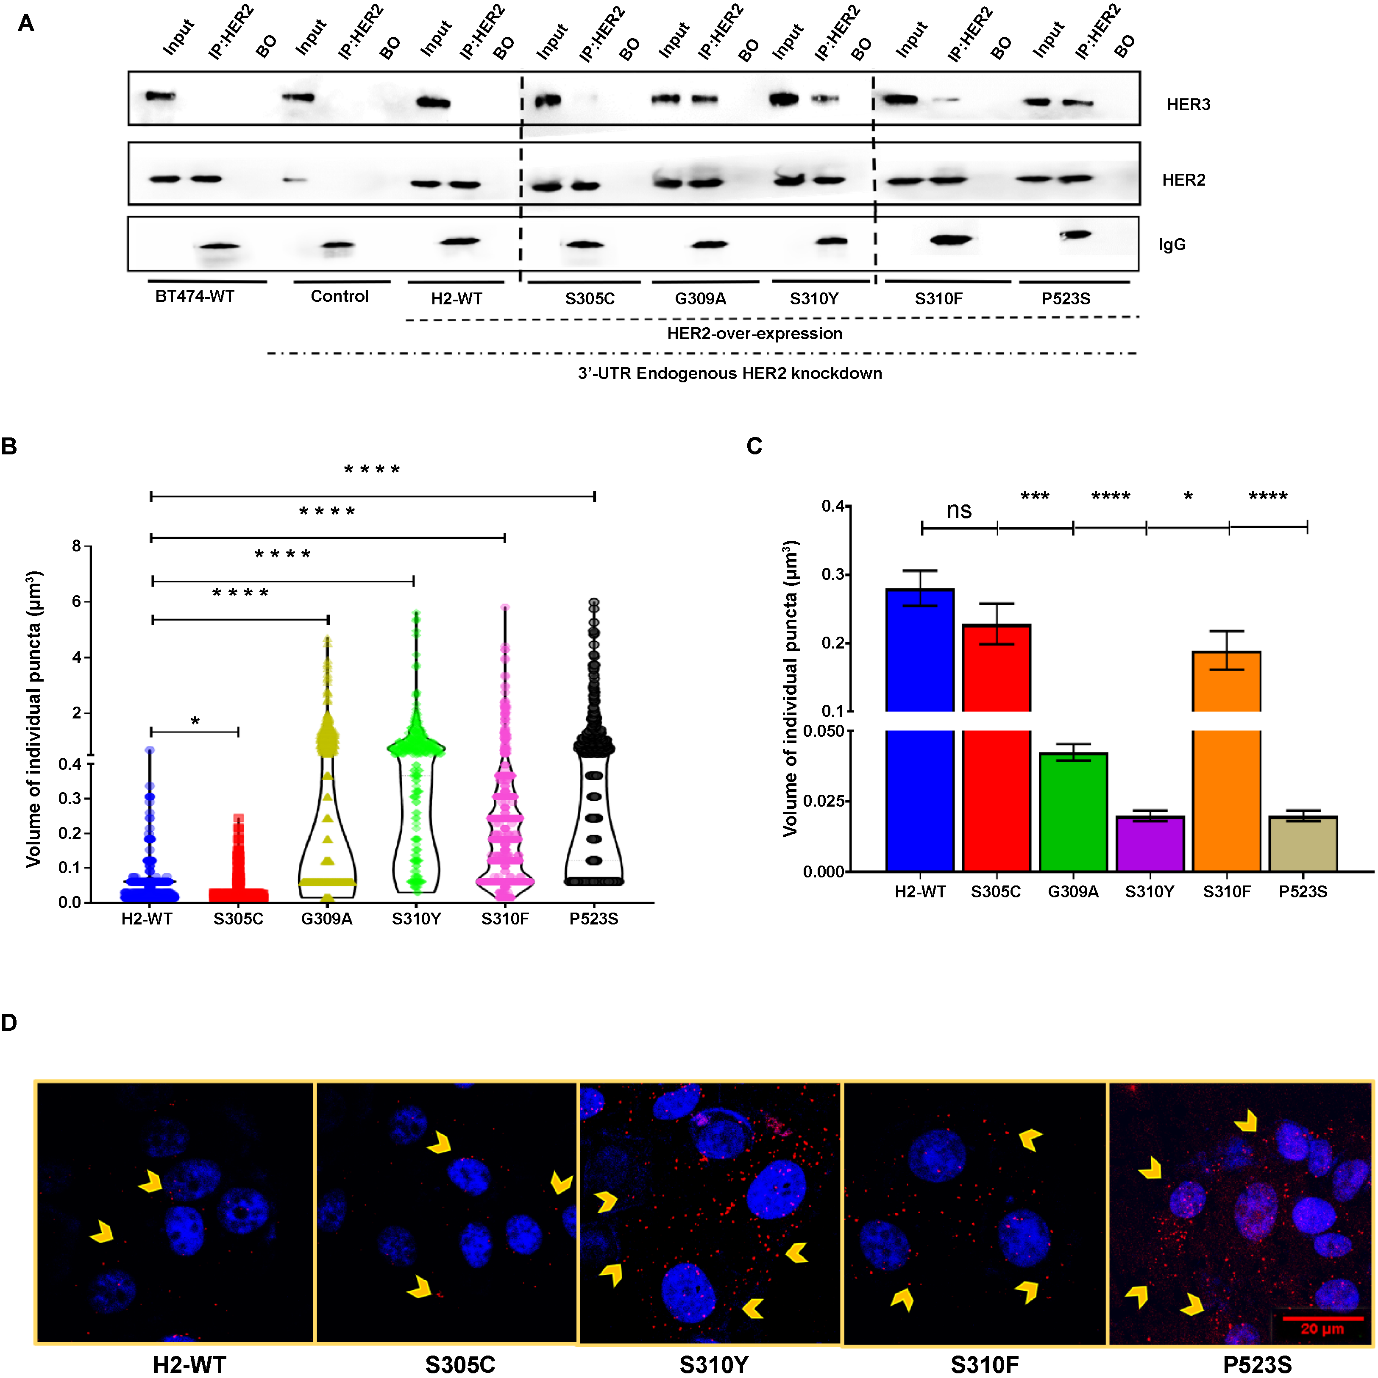
**

**Fig. S3 (A)** Co-immunoprecipitation (Co-IP) result showing interaction with HER3 in HER2 high BT-474 cells overexpressing H2-WT, S305C, G309A, S310Y, S310F or P523S following endogenous HER2 knockdown. Experiment was performed after treating cells with heregulin-1 ligand; loading amount is 1/5th the amount used for IP; BO-Bead only, means lysate without HER2 mAb. (**B**) Graph showing the measured volume of individual HER2:HER3 PLA puncta in ZR-75-1 cells stably expressing either H2-WT or the DDMs. Each dot is an average of puncta/cell (n=200). (**C**) Graph showing the volume of individual pan-HER2:HER3 puncta in ZR-75-1 cells expressing H2-WT and its DDMs. Error bars represent ± SEM; *P<0.05; **P<0.01; ***P<0.001 ****P<0.0001; ns- nonsignificant. (**D**) Immunofluorescence images of AU-565 cells stably expressing H2-WT or DDMs showing PLA puncta (red) denoting HER2:HER3 interaction in cells after heregulin-1 stimulation; scale bar- 20 m.

**
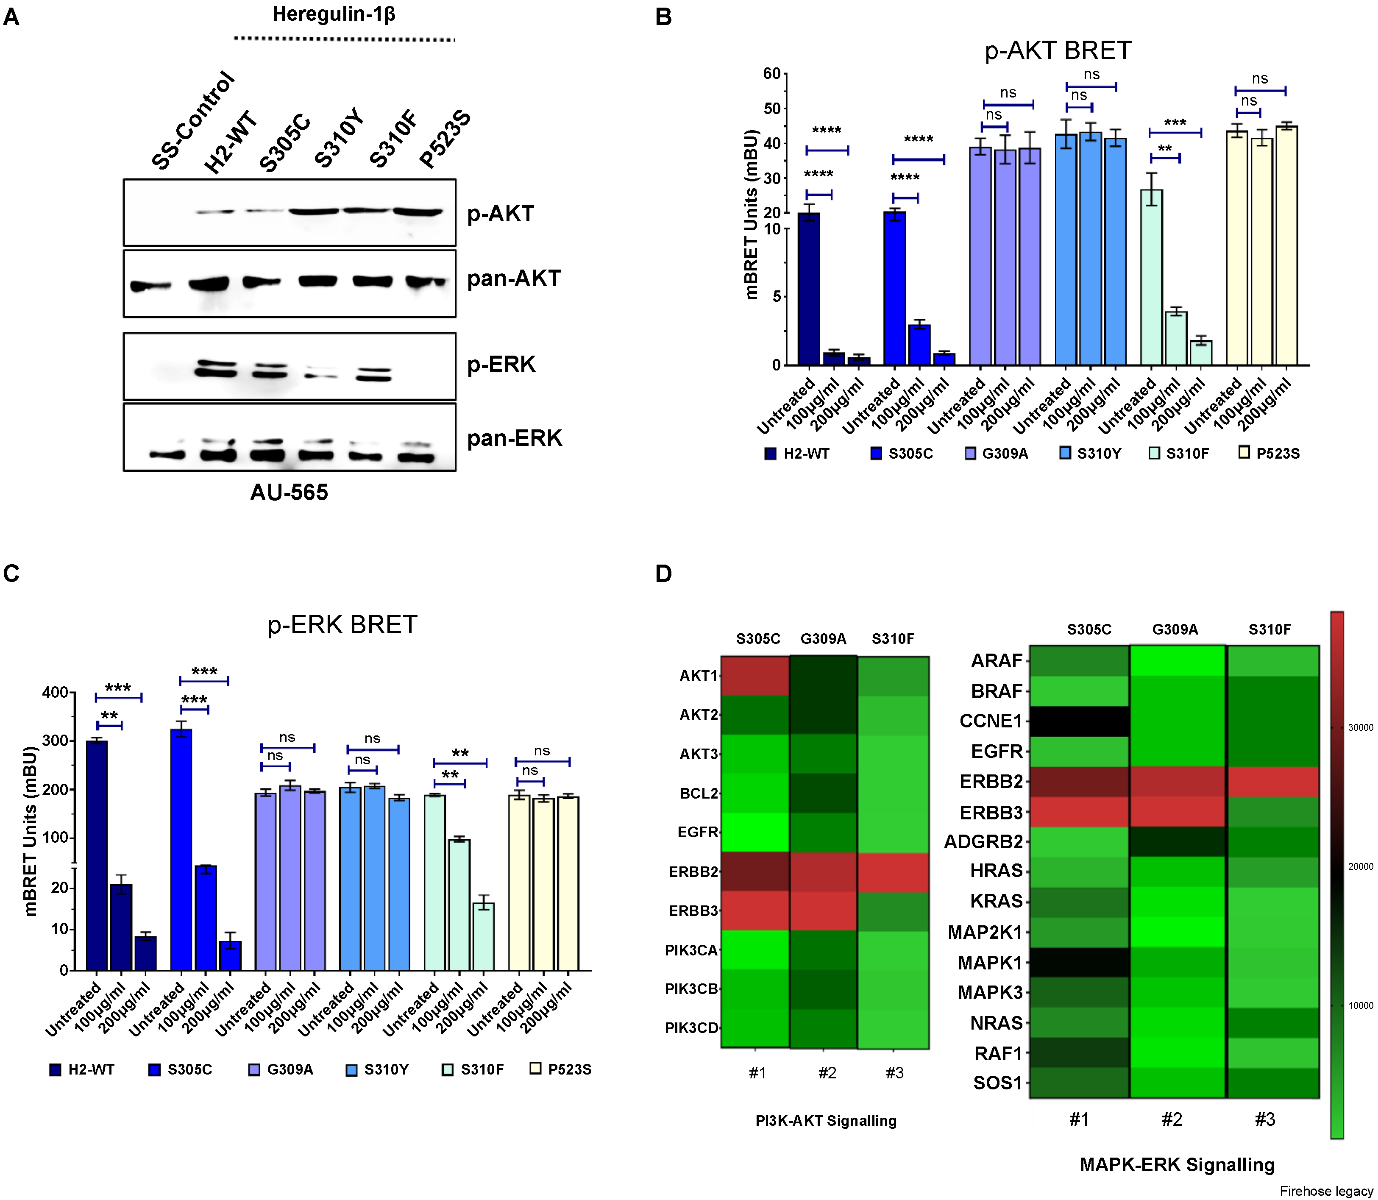
**

**Fig. S4 (A)** Western blot showing expression levels of p-AKT and p-ERK in AU-565 breast cancer cells expressing HER2 or the DDMs. H2-WT, S305C, and S310F induced activation of p-ERK; in contrast, G309A, S310Y, S310F, and P523S induced activation of p-AKT in both HER2-high and HER2-low cell lines. (**B, C**) Graph showing the effect of trastuzumab on ZR-75-1 cells expressing H2-WT and its DDMs by p-AKT bioluminescence resonance energy transfer (BRET) sensor (**B**) and p-ERK BRET sensor (**C**). H2-WT and S305C mutant expressing cells were highly sensitive to trastuzumab therapy. Error bars represent ± standard error of the mean; *P<0.05; **P<0.01; ***P<0.001 ****P<0.0001; ns- nonsignificant. (**D**) Heatmap showing the activation of MAPK and AKT signaling cascades in breast cancer patients harboring H2-WT and its DDMs represented in Firehose Legacy TCGA database.


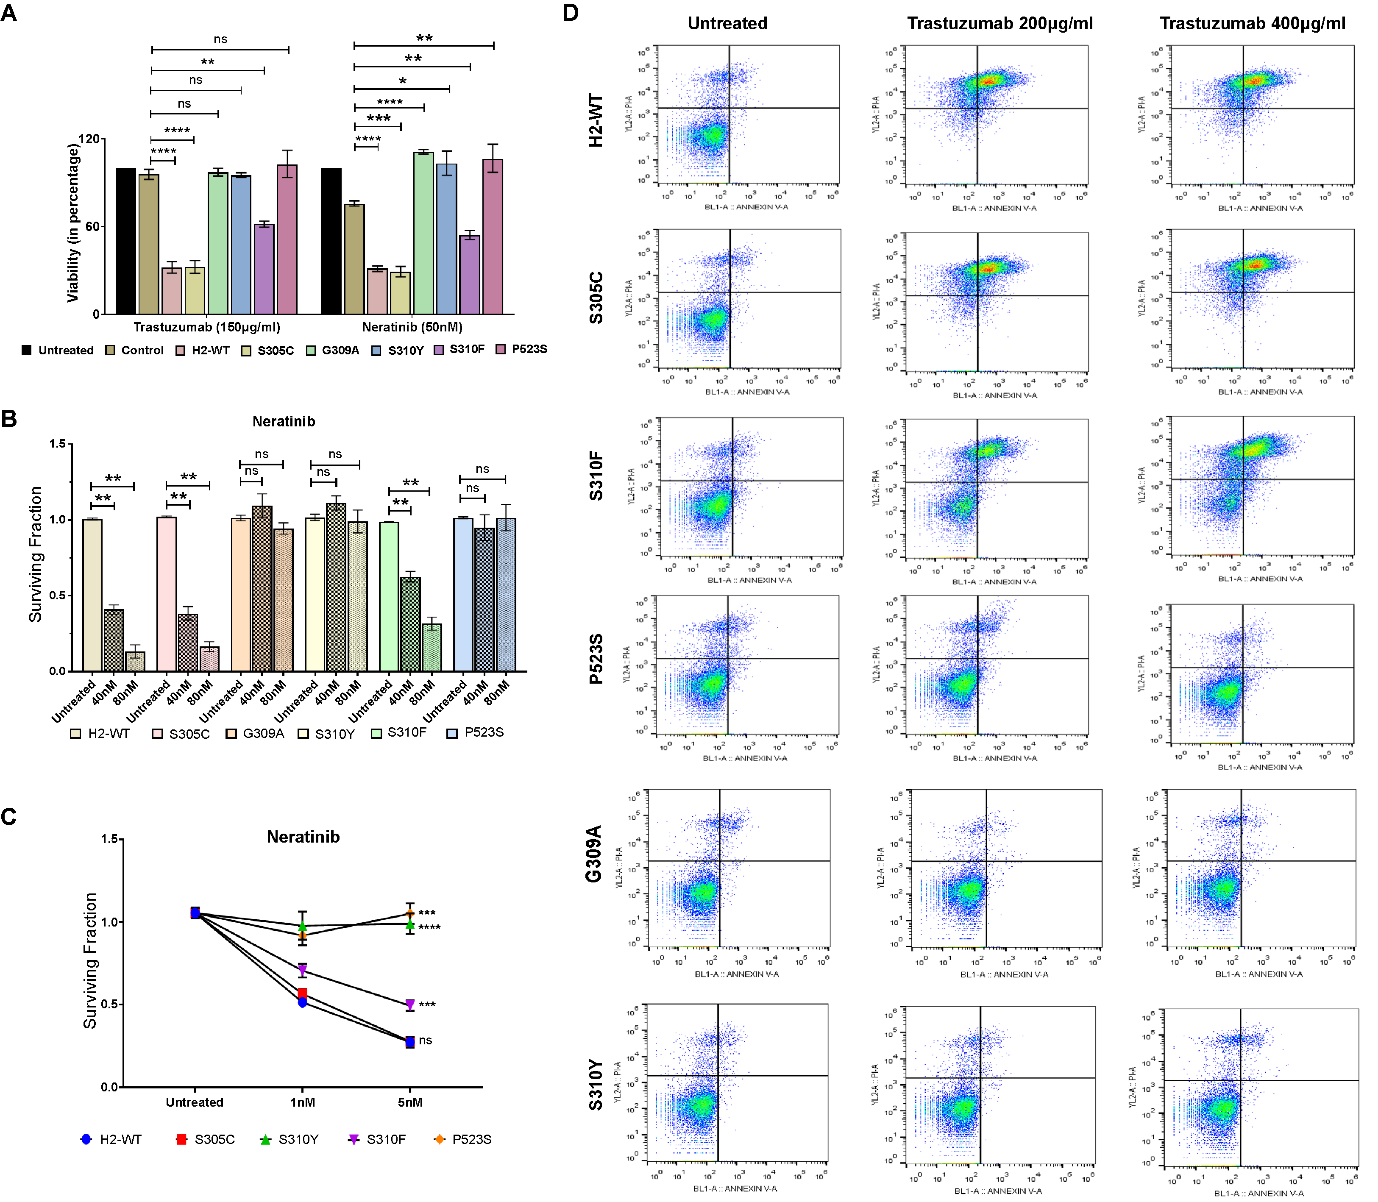


**Fig. S5 (A)** Graph showing short-term cell survival assessment of ZR-75-1 cells expressing H2-WT or the DDMs after treatment with trastuzumab and neratinib. (**B, C**) Graph showing the long-term cell survival ZR-75-1 cells (**B**) and AU-565 cells (**C**) expressing H2-WT or the DDMs after neratinib treatment. Error bars represent ± SEM; *P<0.05; **P<0.01; ***P<0.001 ****P<0.0001; ns-nonsignificant. (**D**) Representative flow cytometry-based apoptosis assessment results showing Annexin V/propidium iodide staining of ZR-75-1 cells expressing H2-WT or DDMs after treatment with higher doses of trastuzumab.

**
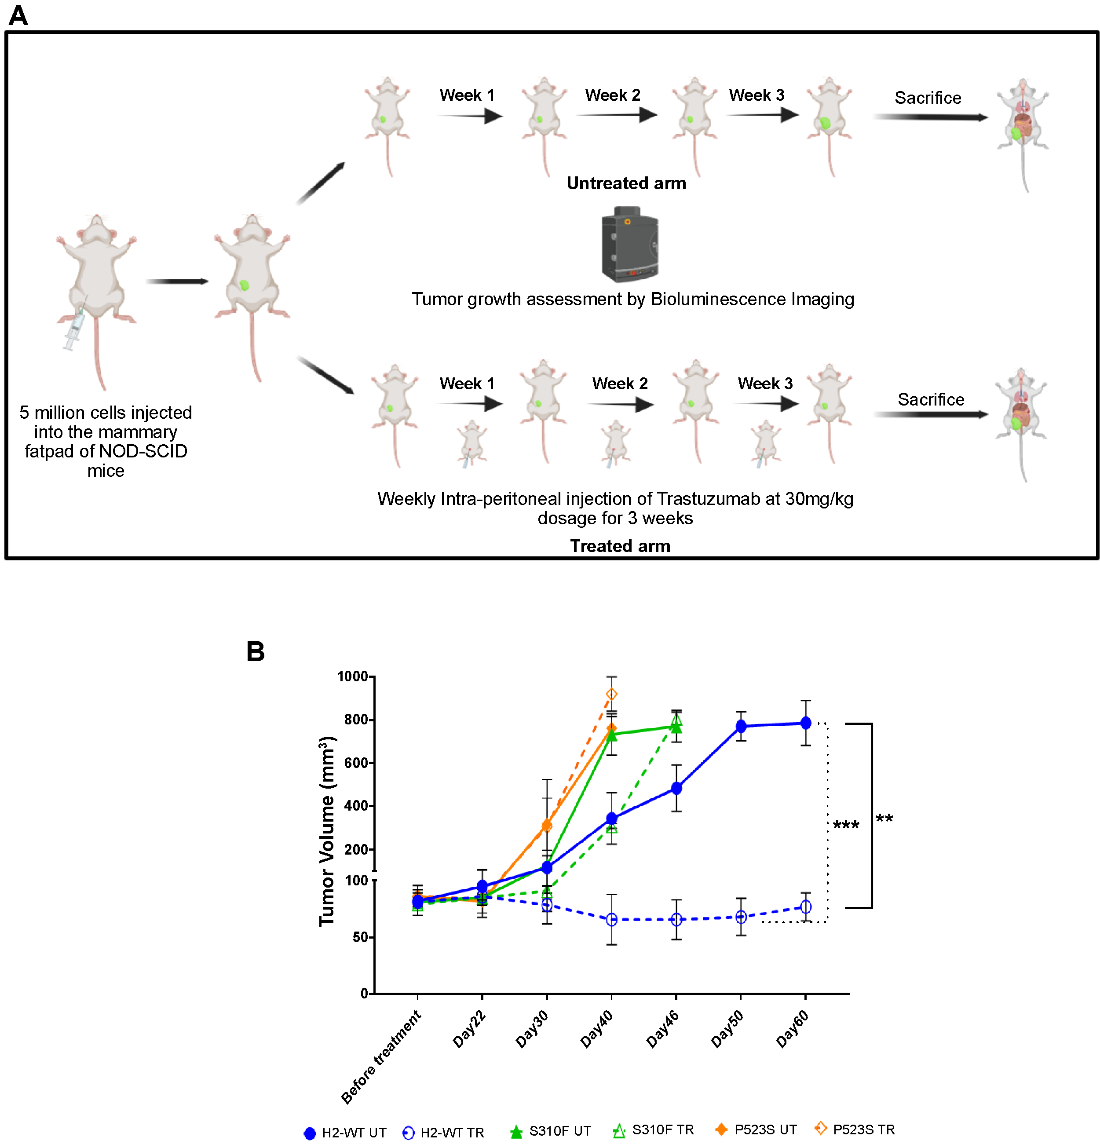
**

**Fig. S6 (A)** Schematic workplan of orthotropic tumor model using immunodeficiency (NOD-SCID) mice. 5×106 HER2 over-expressing ZR-75-1 cells were injected in the mammary fat pad of mice and let grow till tumors attain 80 mm3 volume. The H2-WT, S310F or P523S expressing tumors were then randomized into two groups, i.e. untreated and treated with trastuzumab (30 mg/kg). Trastuzumab was given intraperitoneally once per week for three weeks. Subsequently, after the regimen was completed, the mice were observed for 14 days. The mice were sacrificed and imaged *ex vivo* to check for metastasis. (**B**) Linegraph showing average tumor volume measured for all groups (as indicated) every 5 days for 60 days. Error bars represent ± standard error of the mean for 5 mice/group for H2-WT and S305C and 4 mice/group for P523S; **P<0.01; ***P<0.001.

**
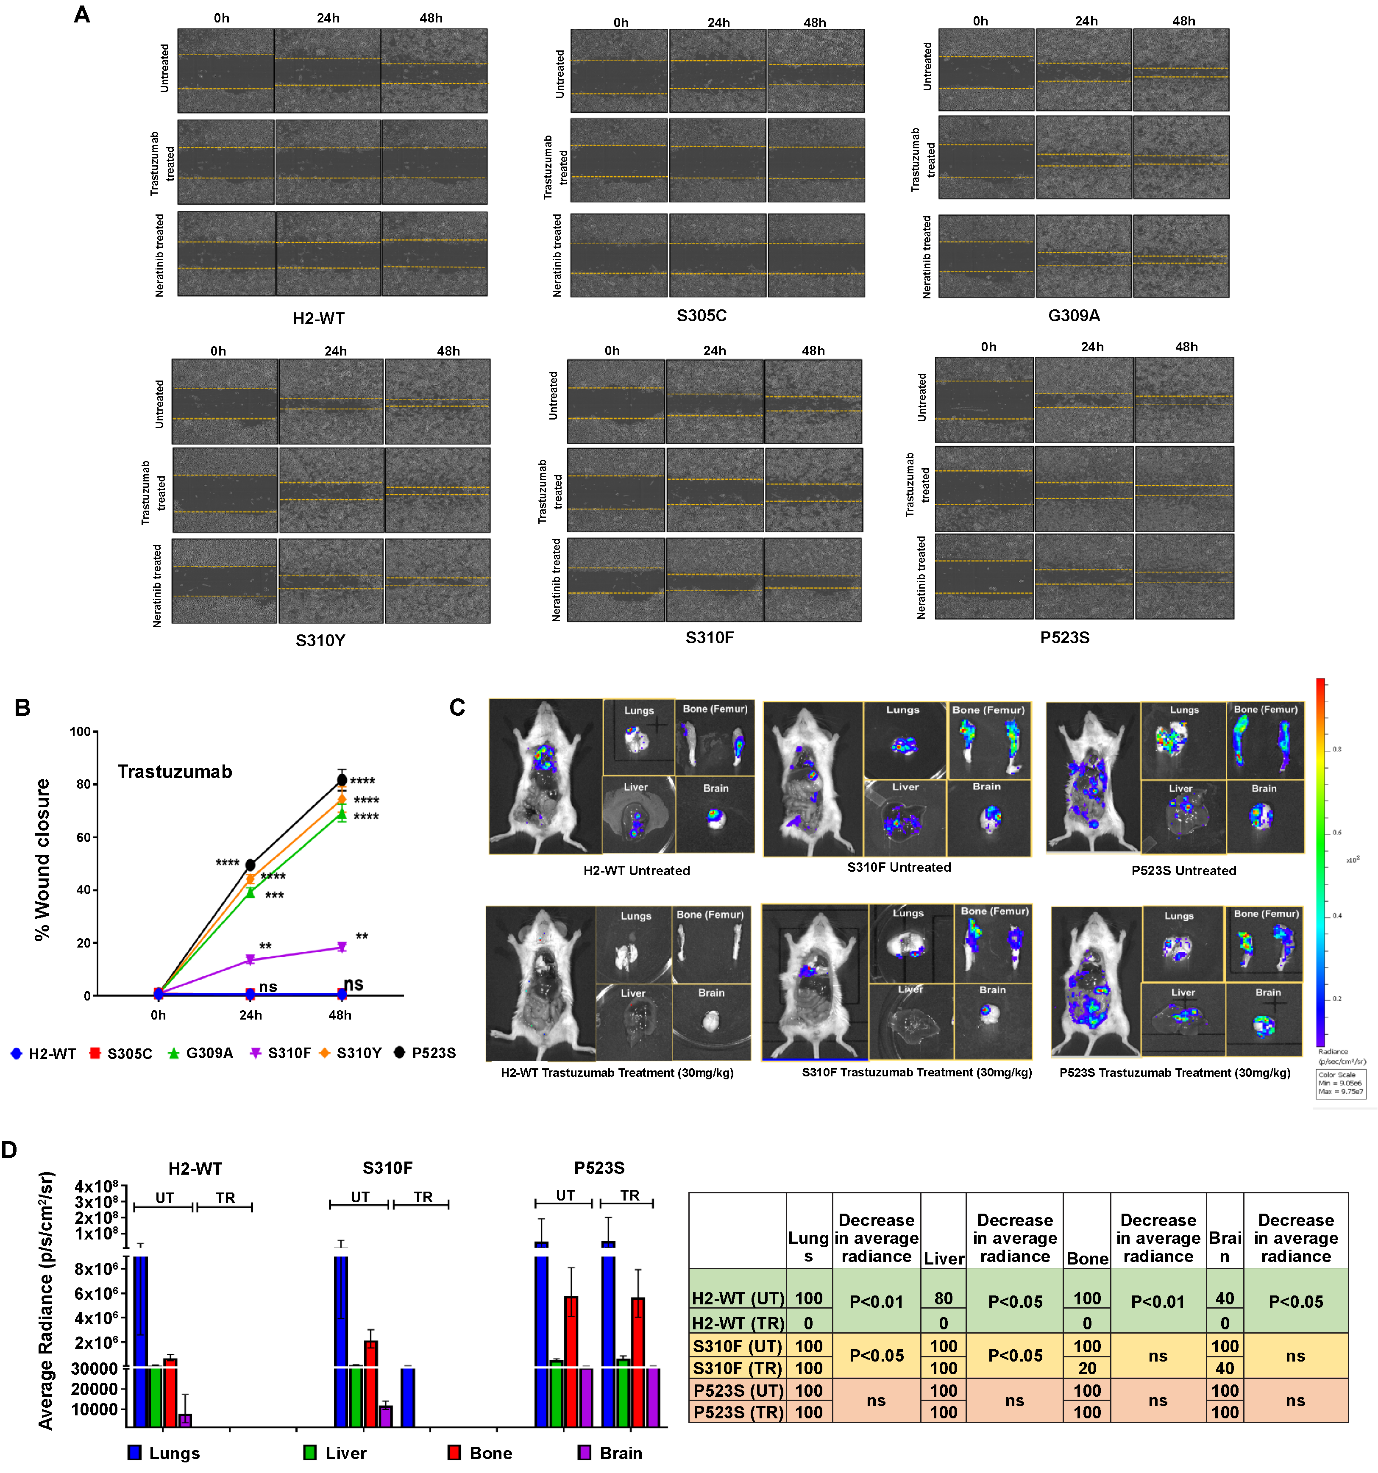
**

**Fig. S7 (A)** Representative photomicrographs of ZR-75-1 cells expressing H2-WT or the DDMs, showing the collective migration. Compared to the G309S, S310Y, and P523S mutant harboring cells, H2-WT and S305C mutant expressing cells showed lesser migratory ability especially when treated with HER2-targeted drugs tested. **(B)** Graph showing the percentage wound closure measured as in (A). Error bars represent ± standard error of the mean; *P<0.05; **P<0.01; ***P<0.001 ****P<0.0001; ns- nonsignificant. (**C**) Representative *ex vivo* BLI images visualizing end-point metastatic tumor load of H2-WT, S310F, and P523S tumor bearing mice. P523S tumors show most aggressive phenotype, followed by S310F tumors, where trastuzumab treatment showed almost no effect on distant metastatic capabilities. (**D**) Graph showing the quantified average radiance from metastatic nodules in the harvested lungs, liver, bone, and brain. Table shows percentage of mice in which metastasis occurred (out of n=5) indicating statistical significance.

**
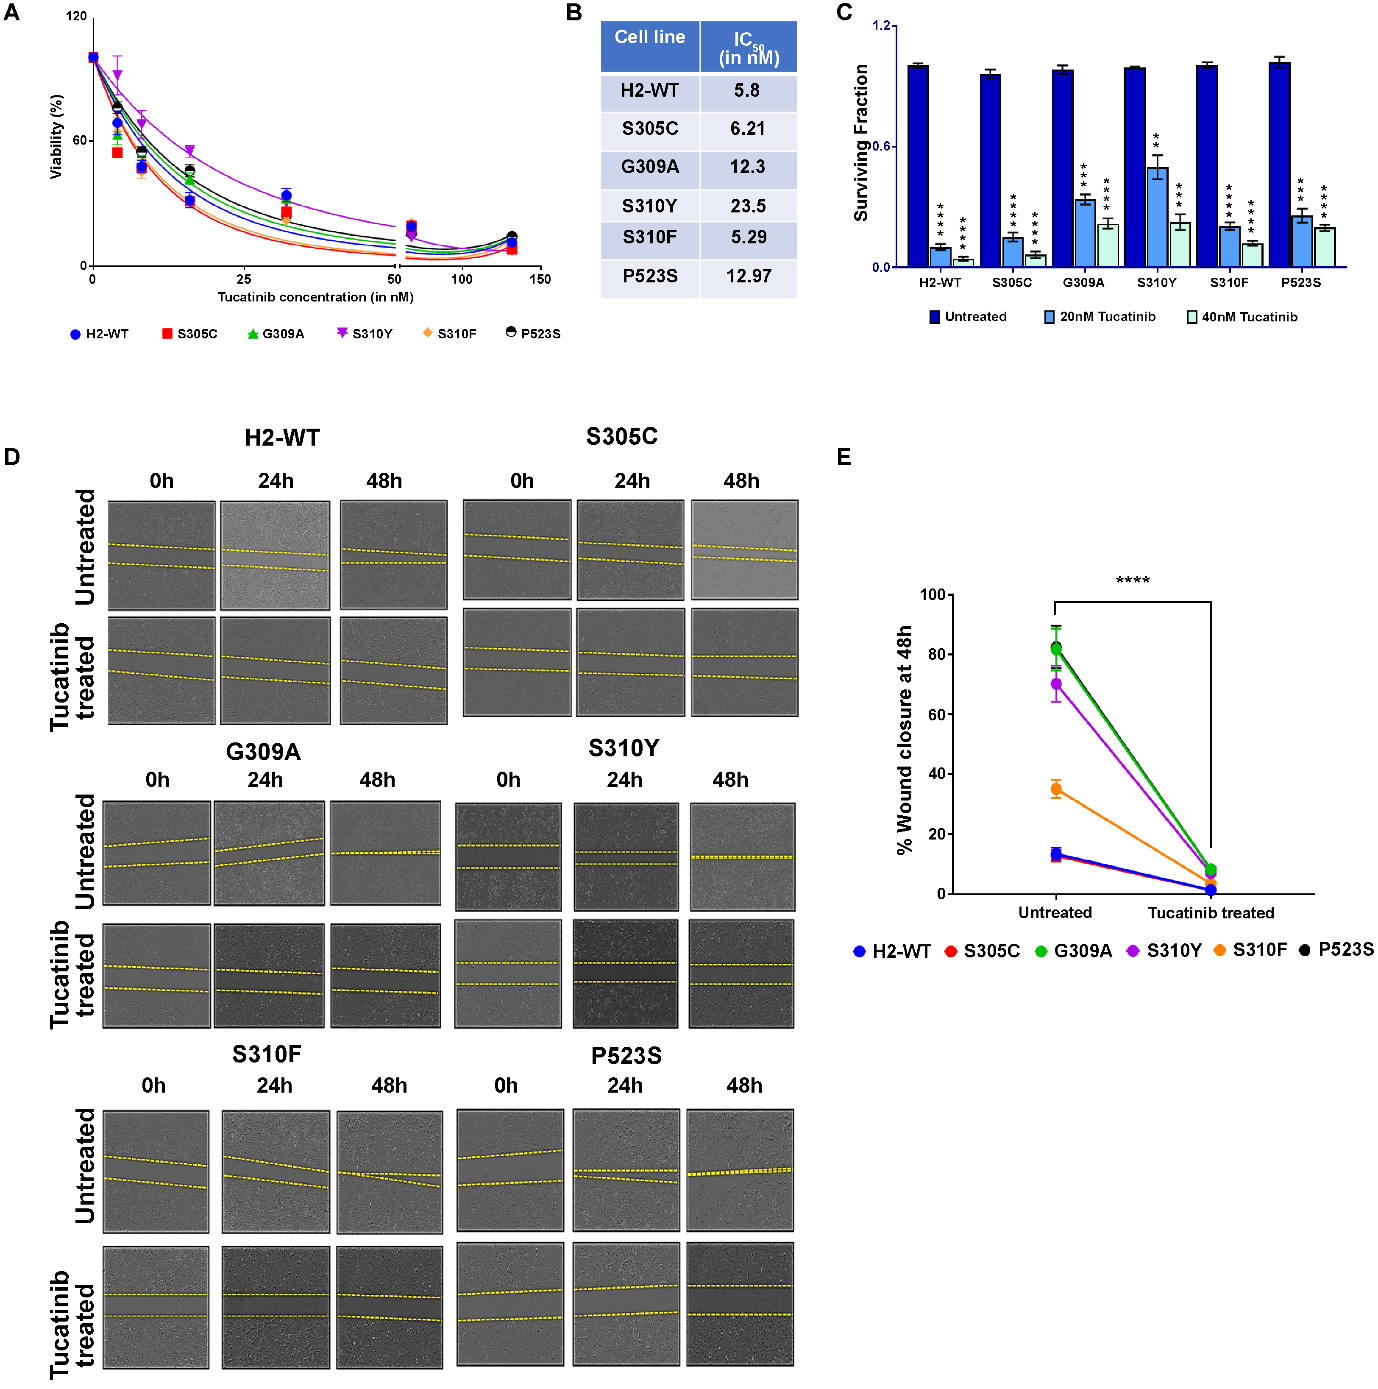
**

**Fig. S8 (A, B)** Graph showing tucatinib dose-response curve in H2-WT or DDMs expressing ZR-75-1 cells (A); table showing the IC50 concentrations determined for the respective H2-WT or DDMs expressing cells ranging from 5.8nM to 23.5nM (B). (**C**) Graph showing the long-term survival capabilities of H2-WT and its DDMs expressing ZR-75-1 cells after tucatinib treatment. Error bars represent ±SEM; ***P<0.001, ****P<0.0001, ns- nonsignificant. (**D**) Representative photomicrographs showing the effect of tucatinib on the collective migratory potential of wild type or mutant expressing cell lines. (**E**) Graph showing the measured wound closure as in (D). Error bars represent ± SEM; ****P<0.0001.

**Supplementary tables**

| **HER2** | | | |
| --- | --- | --- | --- |
| **Mutation** | **Panther** | **Provean** | **Mupro** |
| **S305C** | Probably benign (176) | Neutral (−0.122) | Decrease stability (−1.07) |
| **G309A** | Probably damaging (797) | Neutral (−2.406) | Decrease stability (−0.6) |
| **S310F** | Probably damaging (455) | Deleterious (−4.738) | Decrease stability (−0.13) |
| **S310Y** | Probably damaging (455) | Deleterious (−4.768) | Decrease stability (−0.29) |
| **P523S** | Probably damaging (797) | Deleterious (−6.736) | Decrease stability (−0.765) |

**Supplementary Table 1.** Changes in secondary structure of HER2 due to presence of HER2 dimerization domain mutations

**Supplementary Table 2.** List of site-directed HER2 mutagenesis primer sets used

| **DDM** |  | **Sequence 5’- 3’** |
| --- | --- | --- |
| **S305C** | **Forward primer** | TACAACTACCTTTGTACGGACGTGGGA |
| **Reverse primer** | TCCCACGTCCGTACAAAGGTAGTTGTA |
| **G309A** | **Forward primer** | CTACGGACGTGGCTTCCTGCACCCT |
| **Reverse primer** | AGGGTGCAGGAAGCCACGTCCGTAG |
| **S310Y** | **Forward primer** | GGACGTGGGATACTGCACCCTCGT |
| **Reverse primer** | CCTGCACCCTATGACGTGGGAGCA |
| **S310F** | **Forward primer** | CGGACGTGGGATTCTGCACCCTCGT |
| **Reverse primer** | ACGAGGGTGCAGAATCCCACGTCCG |
| **P523S** | **Forward primer** | CTGCTGGGGTTCAGGGCCCACCC |
| **Reverse primer** | GACGACCCCAAGTCCCGGGTGGG |

**Supplementary** **Table 3.** HER2 3’-UTR endogenous knockdown sequence used

| **shRNA** | **Sequence 5’-3’** |
| --- | --- |
| shRNA 1 | GGAACCTTCCTTCCTGCTTGA |
| shRNA 2 | GGTGTCAGTATCCAGGCTTTG |
| Scrambled | GCGCGATAGCGCTAATAATTT |

**References**

1. Dimri, S., Malhotra, R., Shet, T., Mokal, S., Gupta, S., and De, A. (2020). Noncanonical pS727 post translational modification dictates major STAT3 activation and downstream functions in breast cancer. *Exp. Cell Res.* 396, 112313.
2. Borowicz, S., Scoyk, M. V., Avasarala, S., Rathinam, M. K. K., Tauler, J., Bikkavilli, R. K., Winn, R. A. (2014). The soft agar colony formation assay. *J. Vis. Exp.* 92, e51998.
3. Lee, C. (2007). Protein extraction from mammalian tissues. *Methods Mol. Biol.* 362, 385–389.

1. Molecular Functional Imaging Laboratory, Advanced Centre for Treatment, Research and Education in Cancer (ACTREC), Tata Memorial Centre; Kharghar, Navi Mumbai 410210, India [↑](#footnote-ref-1)
2. Faculty of Life Sciences, Homi Bhabha National Institute; Mumbai 400094, India [↑](#footnote-ref-2)
3. Imaging Cell Signaling and Therapeutics Laboratory, ACTREC, Tata Memorial Centre; Kharghar, Navi Mumbai 410210, India [↑](#footnote-ref-3)
4. Bioinformatics unit, ACTREC, Tata Memorial Centre; Kharghar, Navi Mumbai 410210, India [↑](#footnote-ref-4)
5. Department of Medical Oncology, Tata Memorial Centre; Kharghar, Navi Mumbai 410210, India [↑](#footnote-ref-5)
6. Faculty of Health Sciences, Homi Bhabha National Institute; Mumbai 400094, India [↑](#footnote-ref-6)
7. Lead contact

   * Correspondence: Requests for further information and resources should be directed to and will be fulfilled by the lead contact, Abhijit De (ade@actrec.gov.in). [↑](#footnote-ref-7)
